# Supplementary material for: Ultrasound-Guided Access Reduces Vascular Complications in Patients Undergoing Catheter Ablation for Cardiac Arrhythmias
Source: MDPI journal article supplement (doi:10.3390/jcm11226766), 2022-11-15
Supplement: s1 [file s1]

**Supplemental Table S1: Risk factors for vascular access complications****AV-Fistula**

|                      | OR   | P-value | 95%-CI             |
|----------------------|------|---------|--------------------|
| Vascular disease     | 3.1  | 0.007   | <b>1.365–7.457</b> |
| Ventricular ablation | 12.7 | 0.003   | 7.34-28.123        |

**Pseudoaneurysma**

|                         | OR   | P-value | 95%-CI       |
|-------------------------|------|---------|--------------|
| BMI>30kg/m <sup>2</sup> | 4.3  | 0.047   | 1.019-18.358 |
| Ventricular ablation    | 5.27 | 0.048   | 3.142-8.254  |

**Supplemental Table S2 Risk factor age >70 years for vascular access complications**

|                                     | OR    | p-value | 95%-CI      |
|-------------------------------------|-------|---------|-------------|
| Hematoma >5cm                       | 1.4   | 0.827   | 0.601-4.143 |
| Pseudoaneurysm                      | 1.521 | 0.598   | 0.392-7.024 |
| AV-fistulas                         | 0.559 | 0.521   | 0.389-2.083 |
| Total vascular access complications | 1.447 | 0.689   | 0.600-2.306 |

**Supplemental Table S3 Risk factor female sex**

|                                     | OR    | p-value | 95%-CI       |
|-------------------------------------|-------|---------|--------------|
| Hematoma >5cm                       | 7.553 | 0.083   | 0.645-23.563 |
| Pseudoaneurysm                      | 1.525 | 0.674   | 0.3504.180   |
| AV-fistulas                         | 4.384 | 0.214   | 0.469-8.371  |
| Total vascular access complications | 0.214 | 0.195   | 0.164-2.412  |
